# Supplementary material for: Copper-Cobalt Bimetallic nanoparticles supported on Magnetic MOF Derived N-doped carbon as highly efficient Catalysts for the C–N coupling and one-pot multicomponent reaction
Source: Research Square preprint supplement (doi:10.21203/rs.3.rs-5726553/v1), 2025-01-09
Supplement: Supplementary file 1 [file 5fb7307171156d9843ce1329.docx]

**Copper-Cobalt Bimetallic nanoparticles supported on Magnetic MOF Derived N-doped carbon as highly efficient Catalysts for the C–N coupling and one-pot multicomponent reaction**

**Arezoo Ahmadia , Heshmatollah Alinezhada* , Yaghoub Sarrafia**

a Department of Organic Chemistry, Faculty of Chemistry, University of Mazandaran, Babolsar, Iran

*Heshmatollah Alinezhad

E-mail address:

E-mail address: [Heshmat@umz.ac.ir](mailto:Heshmat@umz.ac.ir)

**Product Characterization Data for N-arylation Reactions**


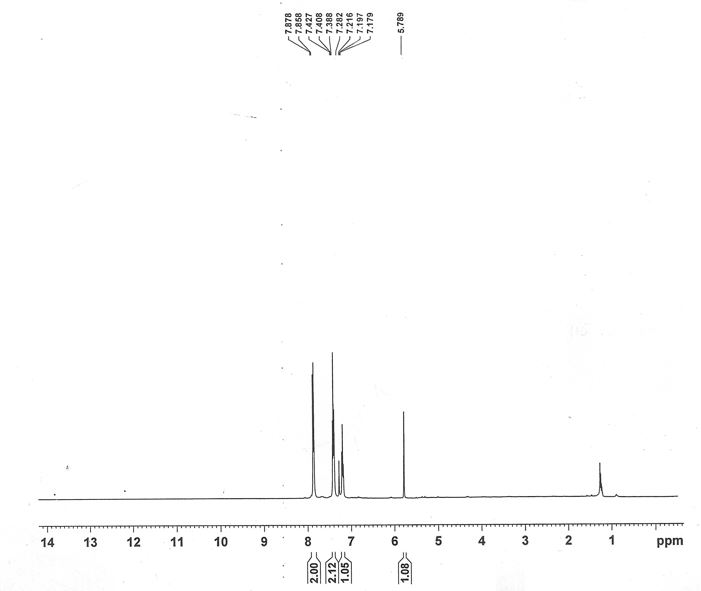
**Diphenylamine (3a):** Colorless solid; mp: 54-55°C (Lit. 53-54°C). 1H NMR: (CDCl3, 400MHZ): *δ* (ppm) = 7.86 (d, 3*J*HH = 8 Hz, 2H, CHAr), 7.40 (d, 3*J*HH = 8 Hz, 2H, CHAr), 7.19 (t, 3*J*HH =7.2 HZ, 1H, CHAr), 5.78 (s, 1H, NH). 13C NMR: (100 MHZ, CDCl3): *δ* (ppm) = 122.3, 132.3, 141.2, 149.0.


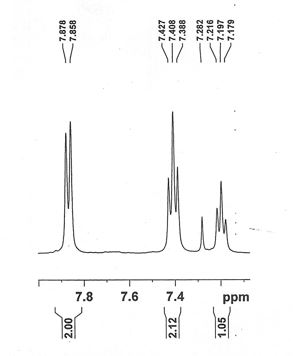


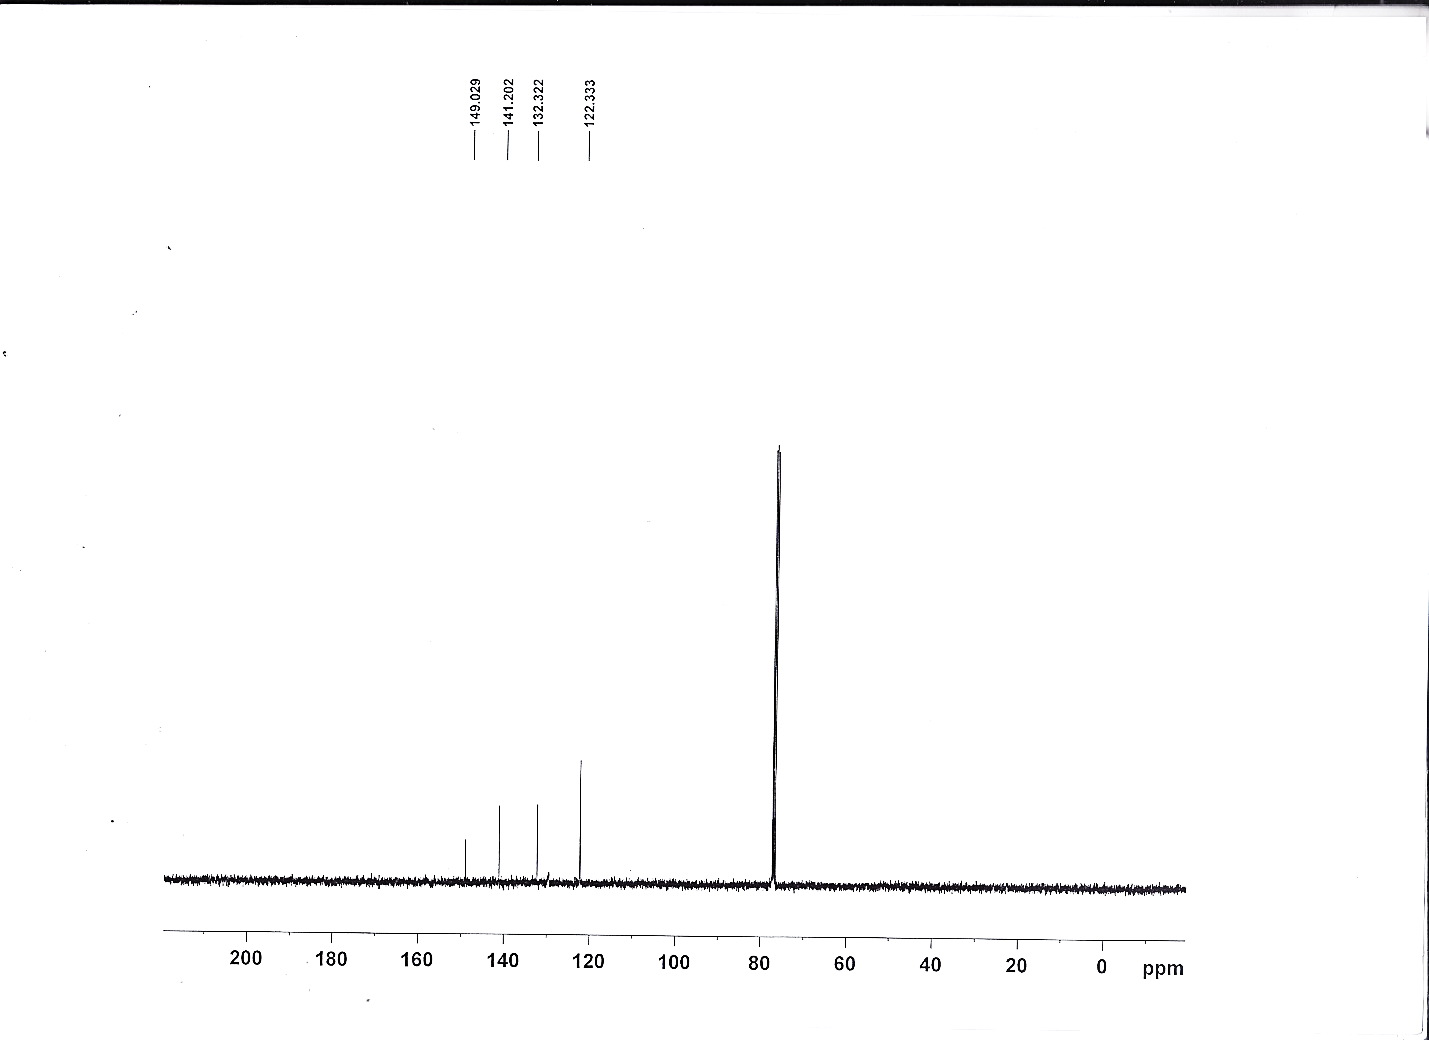


**Fig.S1.** 1HNMR (400 MHz, CDCl3), Expand 1H NMR spectrum (400 MHz, CDCl3), and 13C NMR (100 MHz, CDCl3) spectrum of Diphenylamine (3a).

**4-Nitro-N-phenylaniline (3b):** Yellow solid; mp: 133-135°C (Lit. 135-137°C). 1H NMR: (400 MHz, CDCl3): *δ* (ppm) = 8.49 (d, 3*J*HH = 8.4 Hz, 2H, CHAr), 7.96 (d, 3*J*HH = 7.6 Hz, 2H, CHAr), 7.50 (d, 3*J*HH =8.8 HZ, 2H, CHAr), 7.44 (t, 3*J*HH = 7/6 Hz, 2H, CHAr), 7.34 (s,1H, NH), 7.22 (t, 3*J*HH =7.6 HZ, 1H, CHAr). 13C NMR: (100 MHz, CDCl3): *δ* (ppm) =149.2, 137.2, 131.7, 130.8, 130.6, 131.7, 137.2, 149.2.


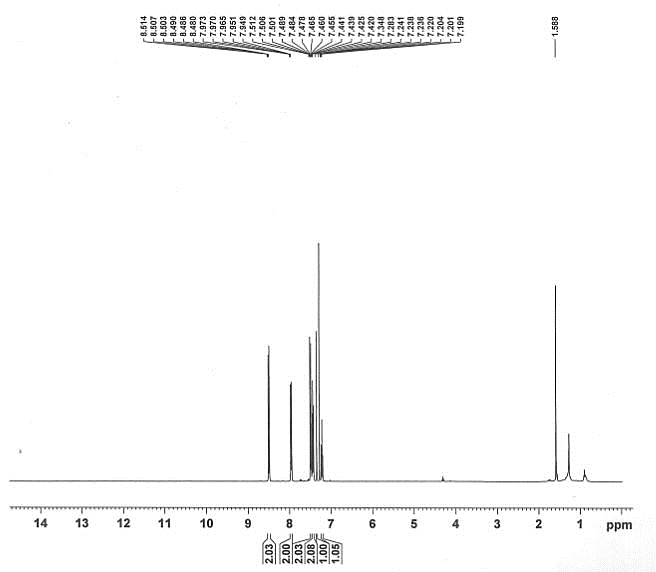


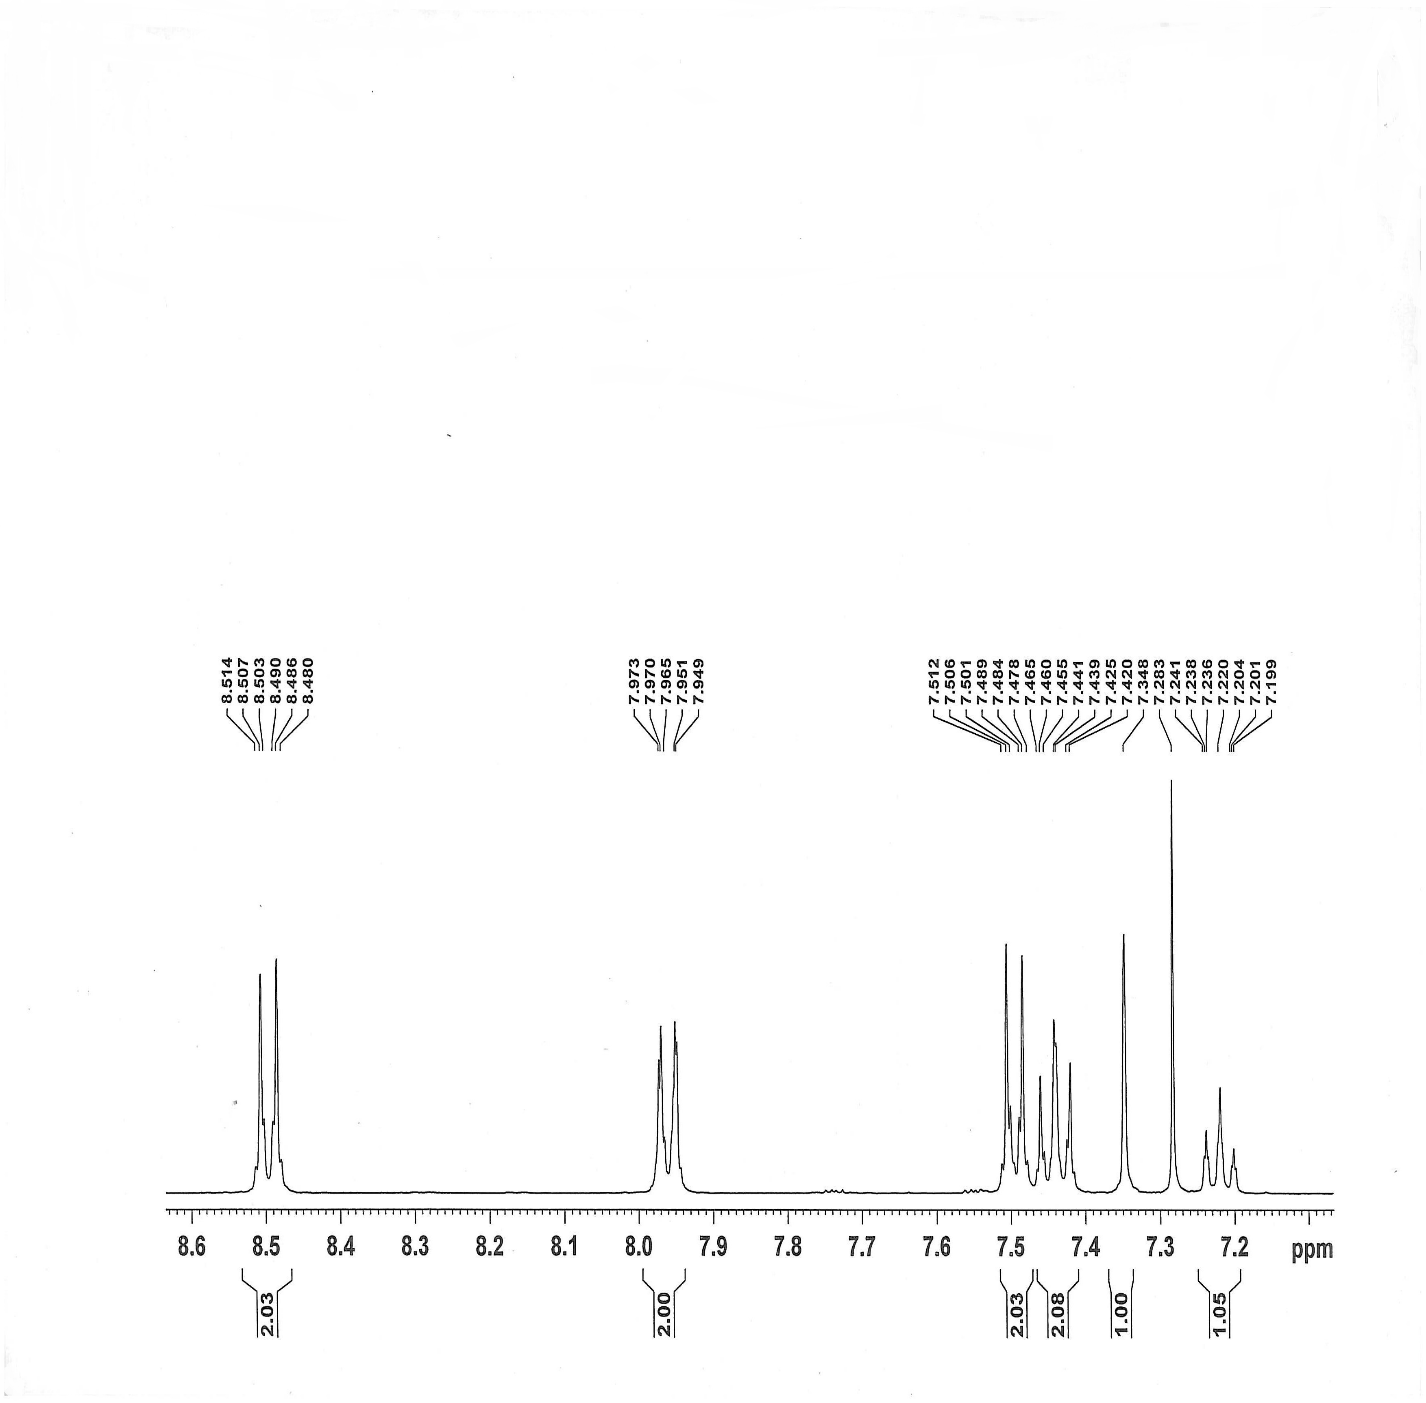


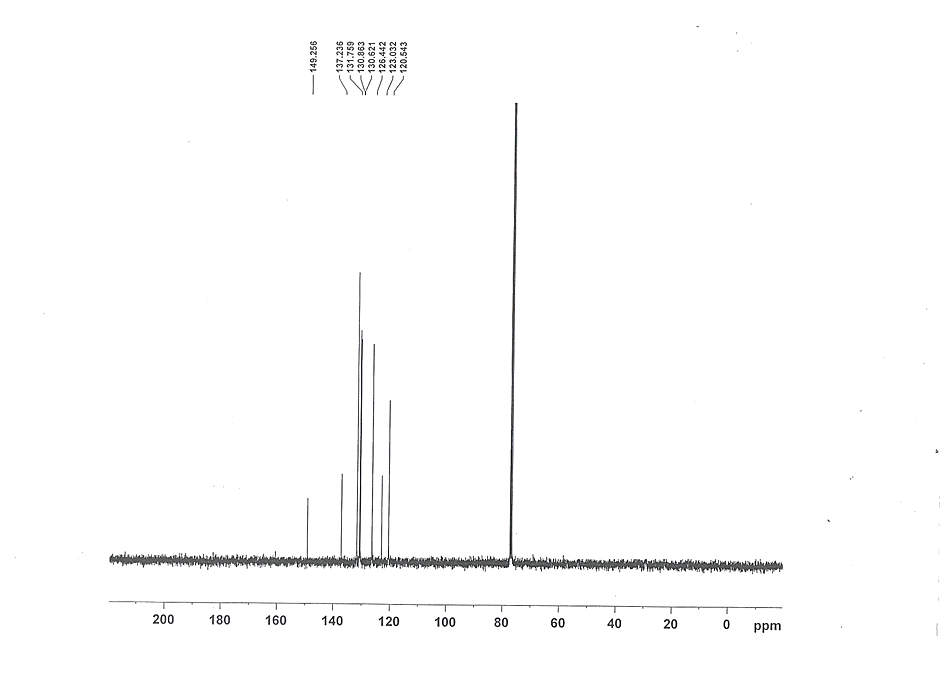


**Fig.** **S2.** 1H NMR (400 MHz, CDCl3), Expand 1H NMR spectrum (400 MHz, CDCl3), and 13C NMR (100 MHz, CDCl3) spectrum of 4-Nitro-N-phenylaniline (3b).

**4-Methoxy-N-phenylaniline** **(3c):** White solid; mp: 105-107°C (Lit. 104-106°C). 1HNMR (DMSO-d6, 400 MHz), δ(ppm) = 3.73 (3H, s, OCH3), 6.26 (1H, s, NH), 7.35 (t, 3*J*HH *=*7.6Hz, 1H, CHAr), 7.47 (t, 3*J*HH *=*8.0Hz,2H, CHAr), 7.71 (d, 3*J*HH *=*6.8Hz, 2H, CHAr), 7.88 (t, 3*J*HH *=*7.2Hz, 2H, CHAr), 8.14 (d, 3*J*HH *=*6.8Hz, 2H, CHAr). 13C NMR (DMSO-d6, 100.6 MHz), δ (ppm)= 158.3, 136.6, 131.9, 131.0, 130.7, 126.6, 123.110, 121.6, 56.4.


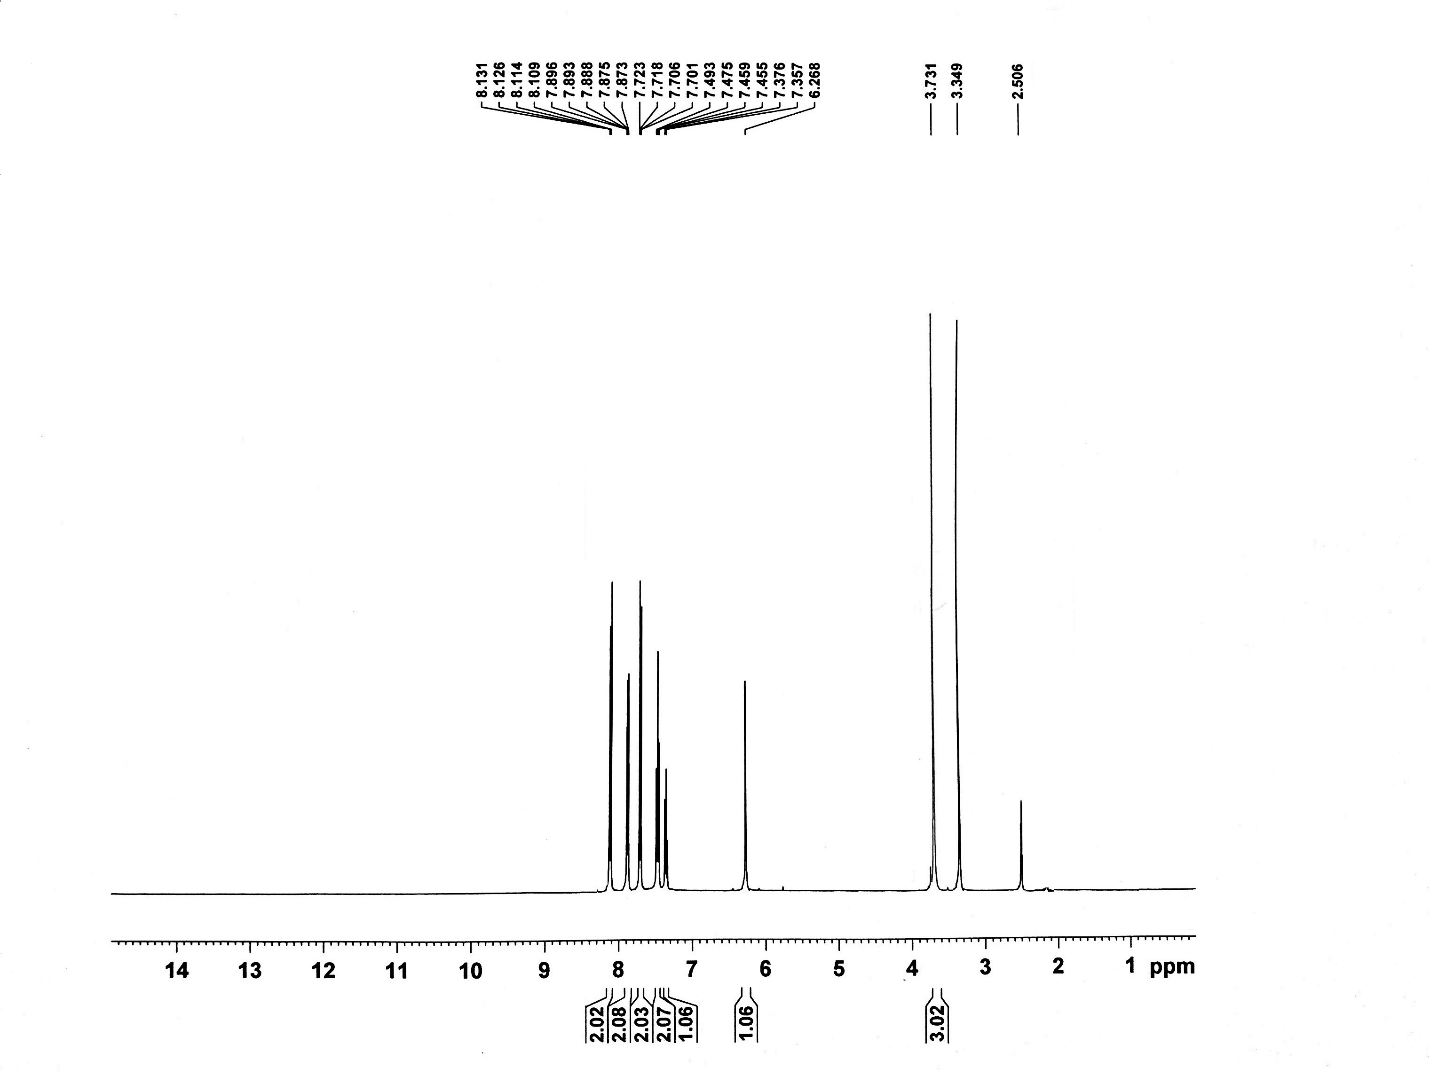


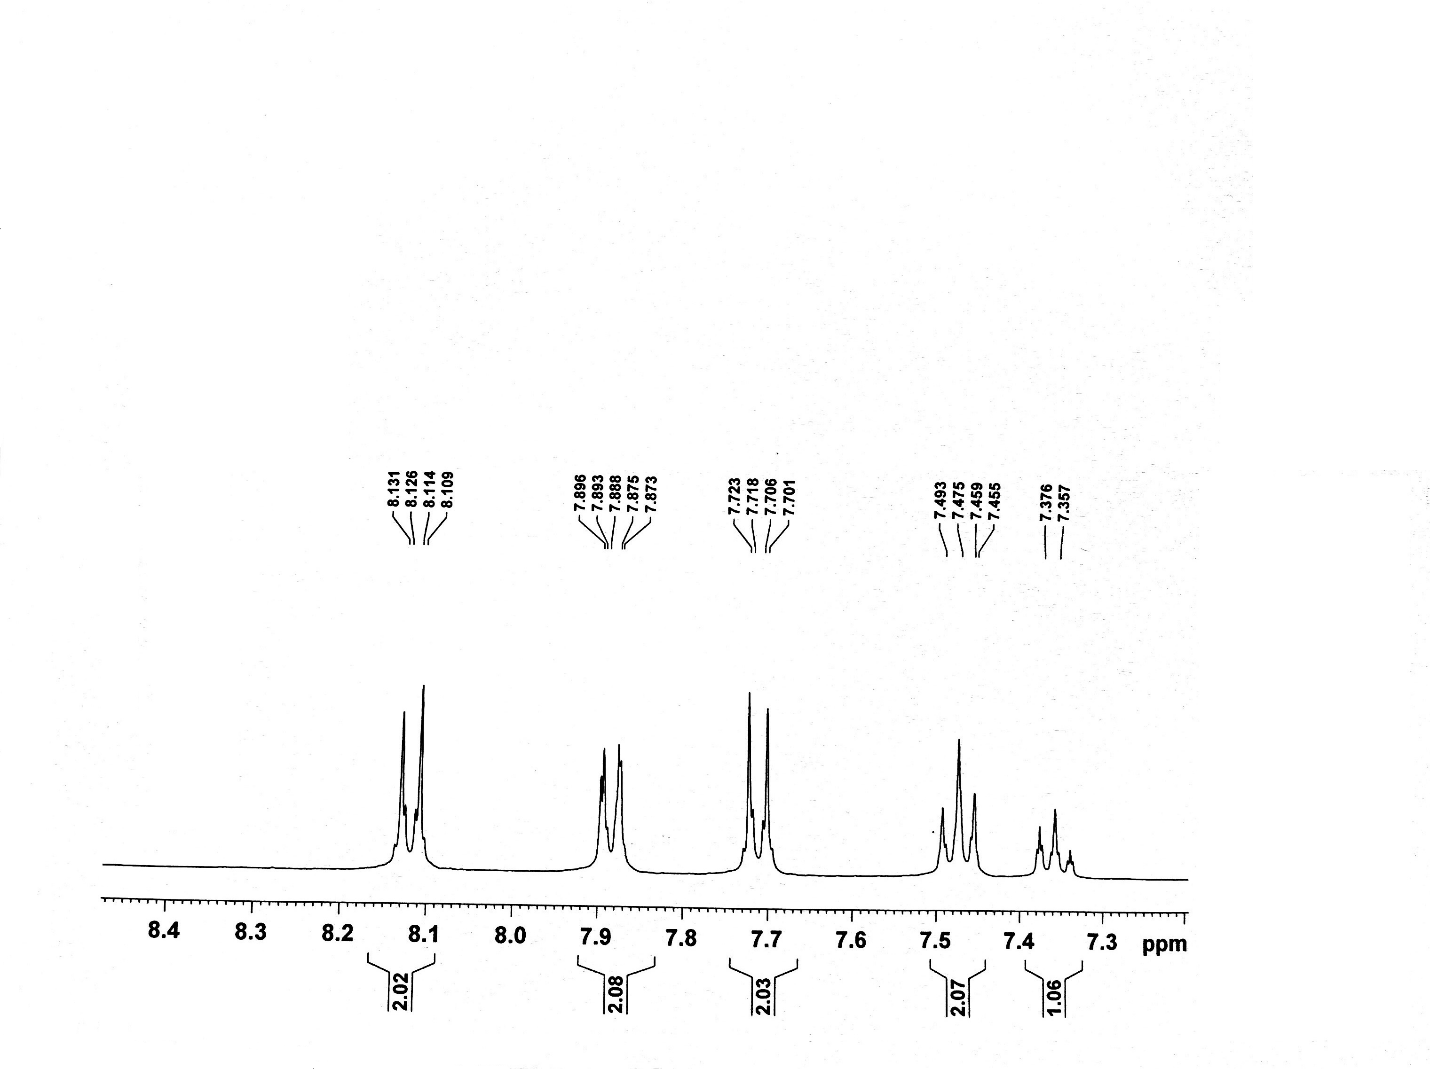


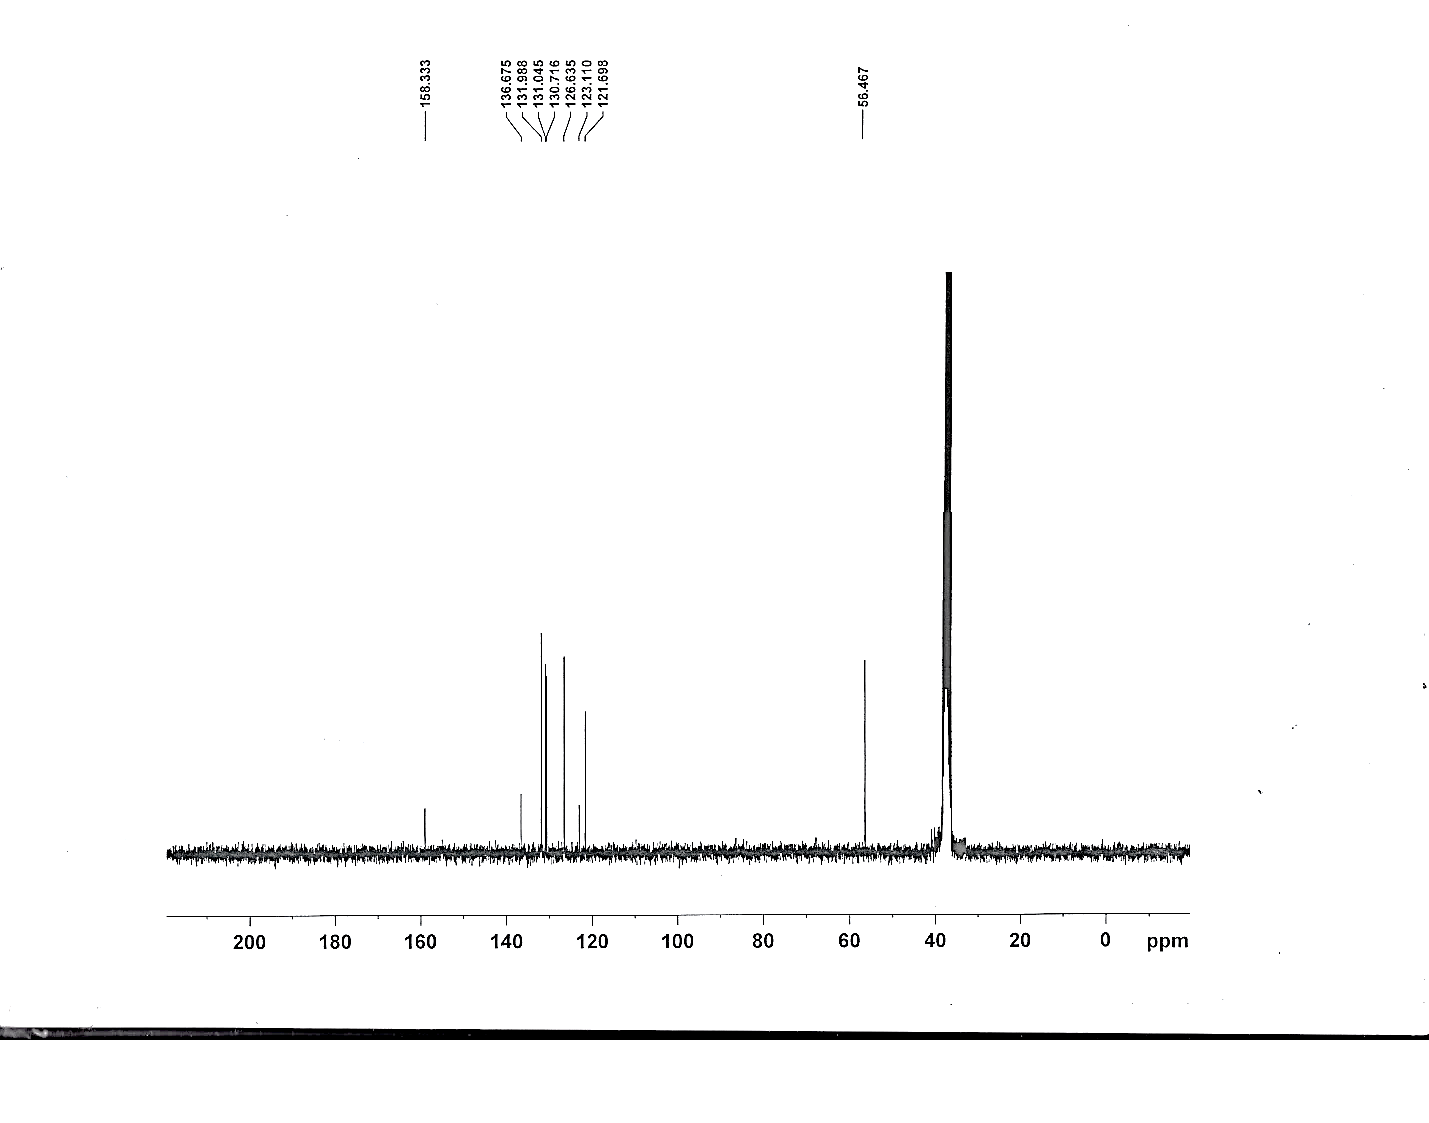


**Fig. S3.** 1HNMR (DMSO-d6, 400MHz), Expand 1H NMR spectrum (400 MHz, DMSO-d6), and 13C NMR (100 MHz, DMSO-d6) spectrum of 4-Methoxy-N-phenylaniline (3c).

**4-Methyl-N-phenylaniline (3****d):** mp: 92-94◦C. 1H NMR: (400 MHz, CDCl3): *δ* (ppm) = 7.63 (d, 3*J*HH = 7.6 Hz, 2H, CHAr), 7.36 (t, 3*J*HH = 8.4 Hz, 2H, CHAr), 7.31 (d, 3*J*HH = 8.4 Hz, 2H, CHAr), 7.15 (t, 3*J*HH = 7.6 Hz, 2H, CHAr), 7.09 (d, 3JHH = 8 Hz, 1H, CHAr), 5.17 (s, 1H, NH), 2.13 (s, 3H, CH3). 13C NMR: (100 MHz, CDCl3): *δ* (ppm) = 139.4, 137.1, 131.3,129.0, 128.9, 126.2, 121.252, 120.3, 33.3.


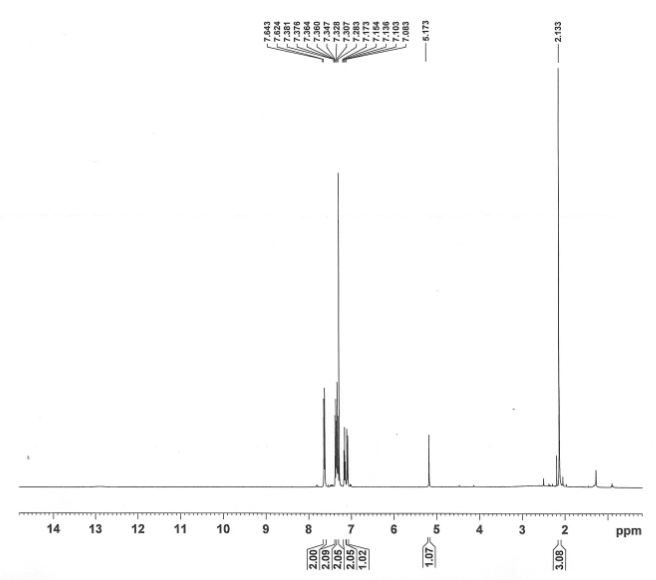


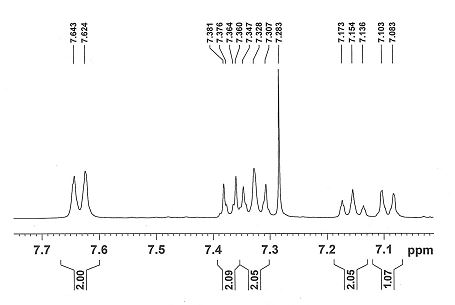


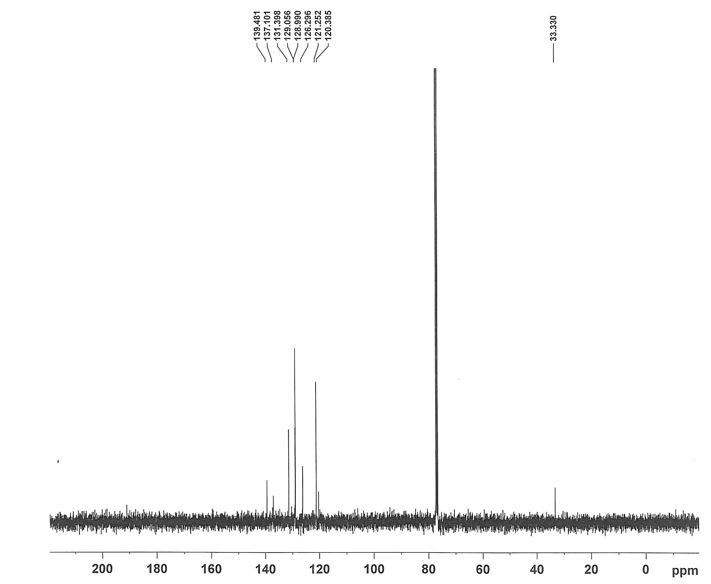
**Fig.** **S4.** 1H NMR (400 MHz, CDCl3), Expand 1H NMR spectrum (400 MHz, CDCl3), and 13C NMR (100 MHz, CDCl3) spectrum of 4-Methyl-N-phenylaniline (3d).

**Product Characterization Data for Biginelli Reactions**

**5-(Ethoxycarbonyl)-6-methyl-4-phenyl-3,4-dihydropyrimidin-2(1H)-one,** **(4a):** White solid; mp: 204-206°C. 1H NMR: (400 MHz, CDCl3): *δ* (ppm) = 1.17 (t, 3JHH = 7.6 Hz, 3H), 2.37 (s, 3H), 4.1 (q, 3JHH = 7.1 Hz, 2H), 5.4 (d, 3JHH = 2 Hz, 1H), 5.73 (s, 1H, NH), 7.28- 7.35 (m, 5H, CHAr), 8.06 (s,1H, NH). 13C NMR: (100 MHz, CDCl3): *δ* (ppm) = 14.1, 18.7, 55.8, 60.0, 101.3, 126.6, 127.8, 128.7, 143.6, 146.1, 153.218, 165.7.


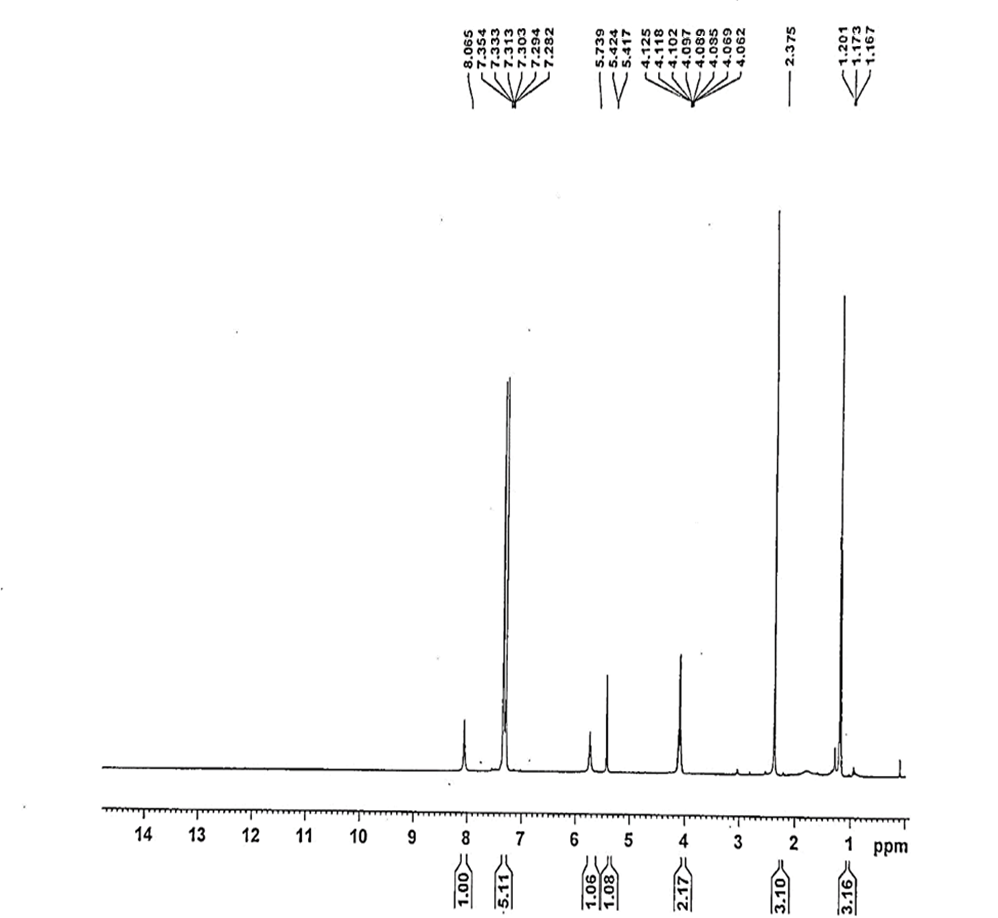


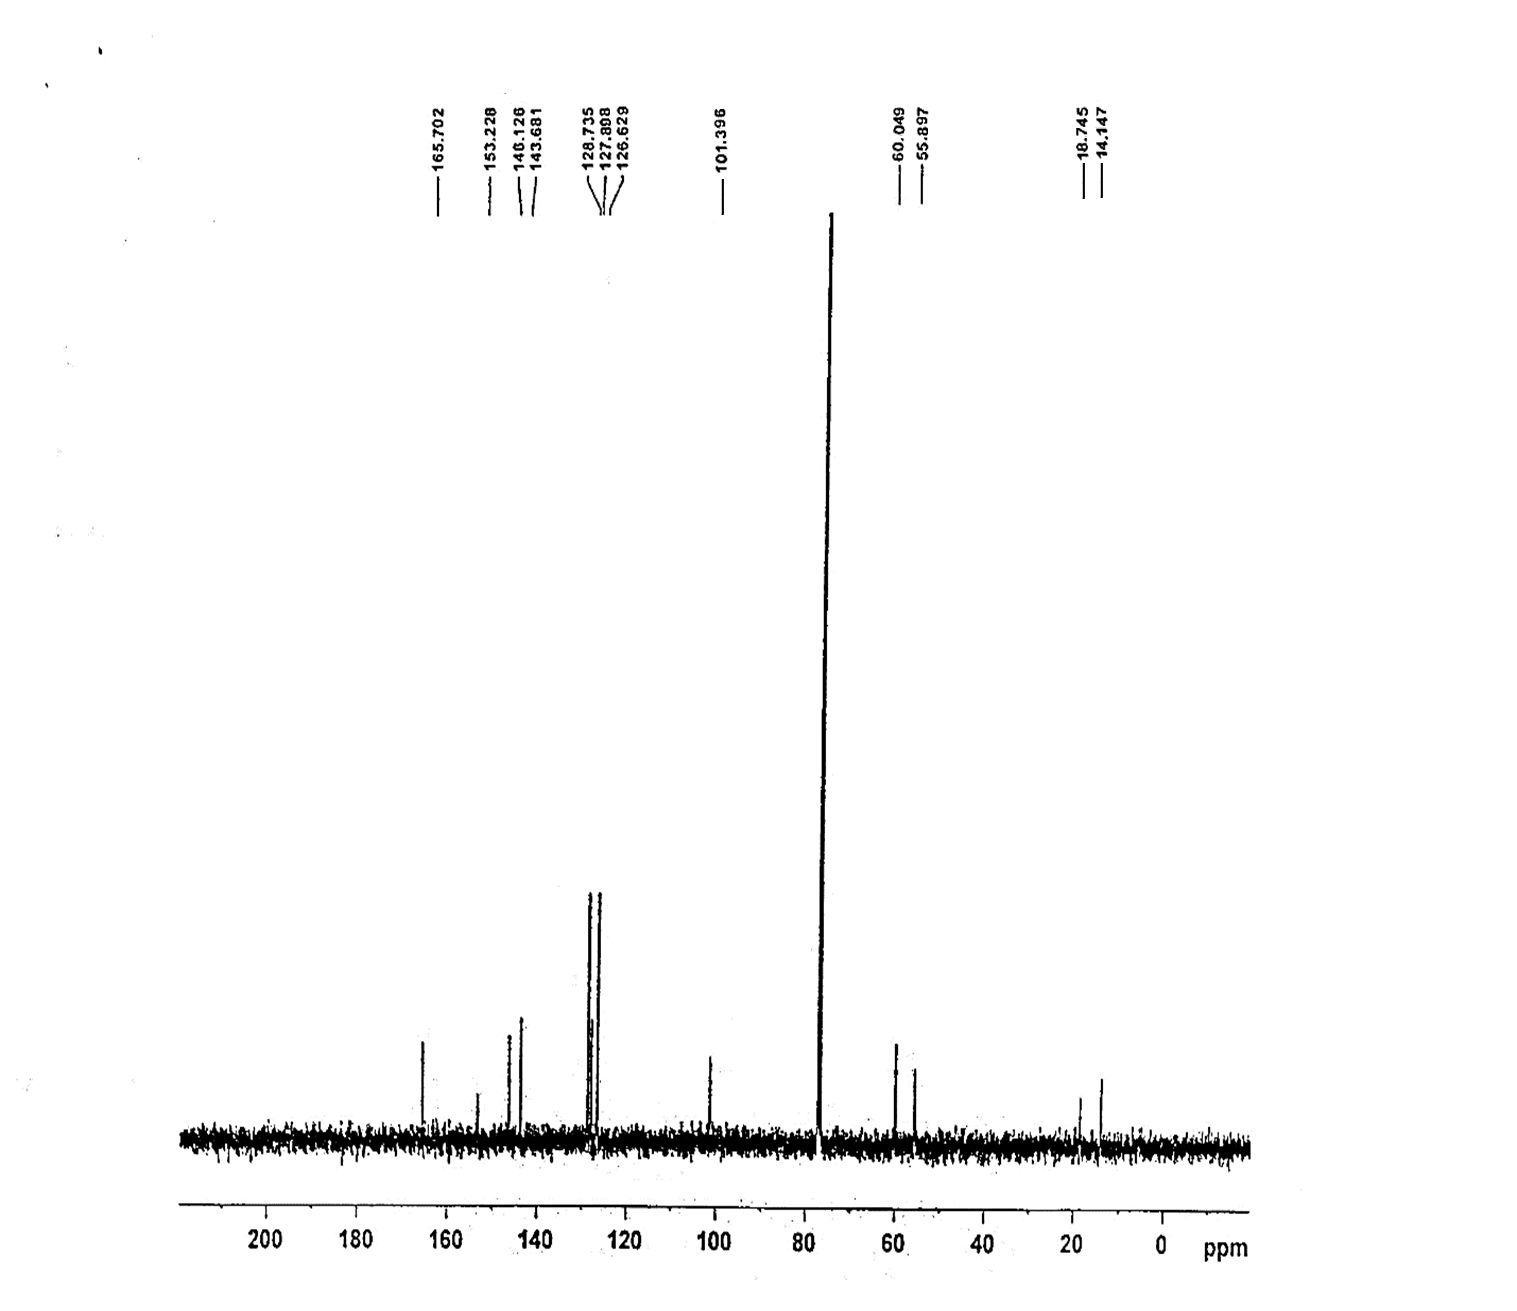


**Fig S5.** 1HNMR (400 MHz, CDCl3) and 13C NMR (100 MHz, CDCl3) spectrum of 5-(Ethoxycarbonyl)-6-methyl-4-phenyl-3,4-dihydropyrimidin-2(1H)- one, (4a).

**5-(Ethoxycarbonyl)-4-(4-chlorophenyl)-6-methyl-3,4-dihydropyrimidin-2(1H)-on**, **(4b)**:Yellow solid; mp: 213-215°C. 1H NMR: (400 MHz, CDCl3): δ (ppm) 1.18 (t, 3JHH = 6.8 Hz ,3H), 2.36 (s, 3H), 4.10 (q, 3JHH = 7.2 Hz, 2H), 5.38 (s, 3JHH = 2.4, 1H), 5.89 (s, NH, 1H) ,7.27- 7.29 (m, 4H, CHAr) ,8.17 (s, NH, 1H). 13C NMR: (100MHz, CDCl3): *δ* (ppm) = 14.2 ,18.8, 55.1, 60.2, 101.1, 128.1, 128.9, 133.8, 142.1, 146.5, 153.1, 165.4.


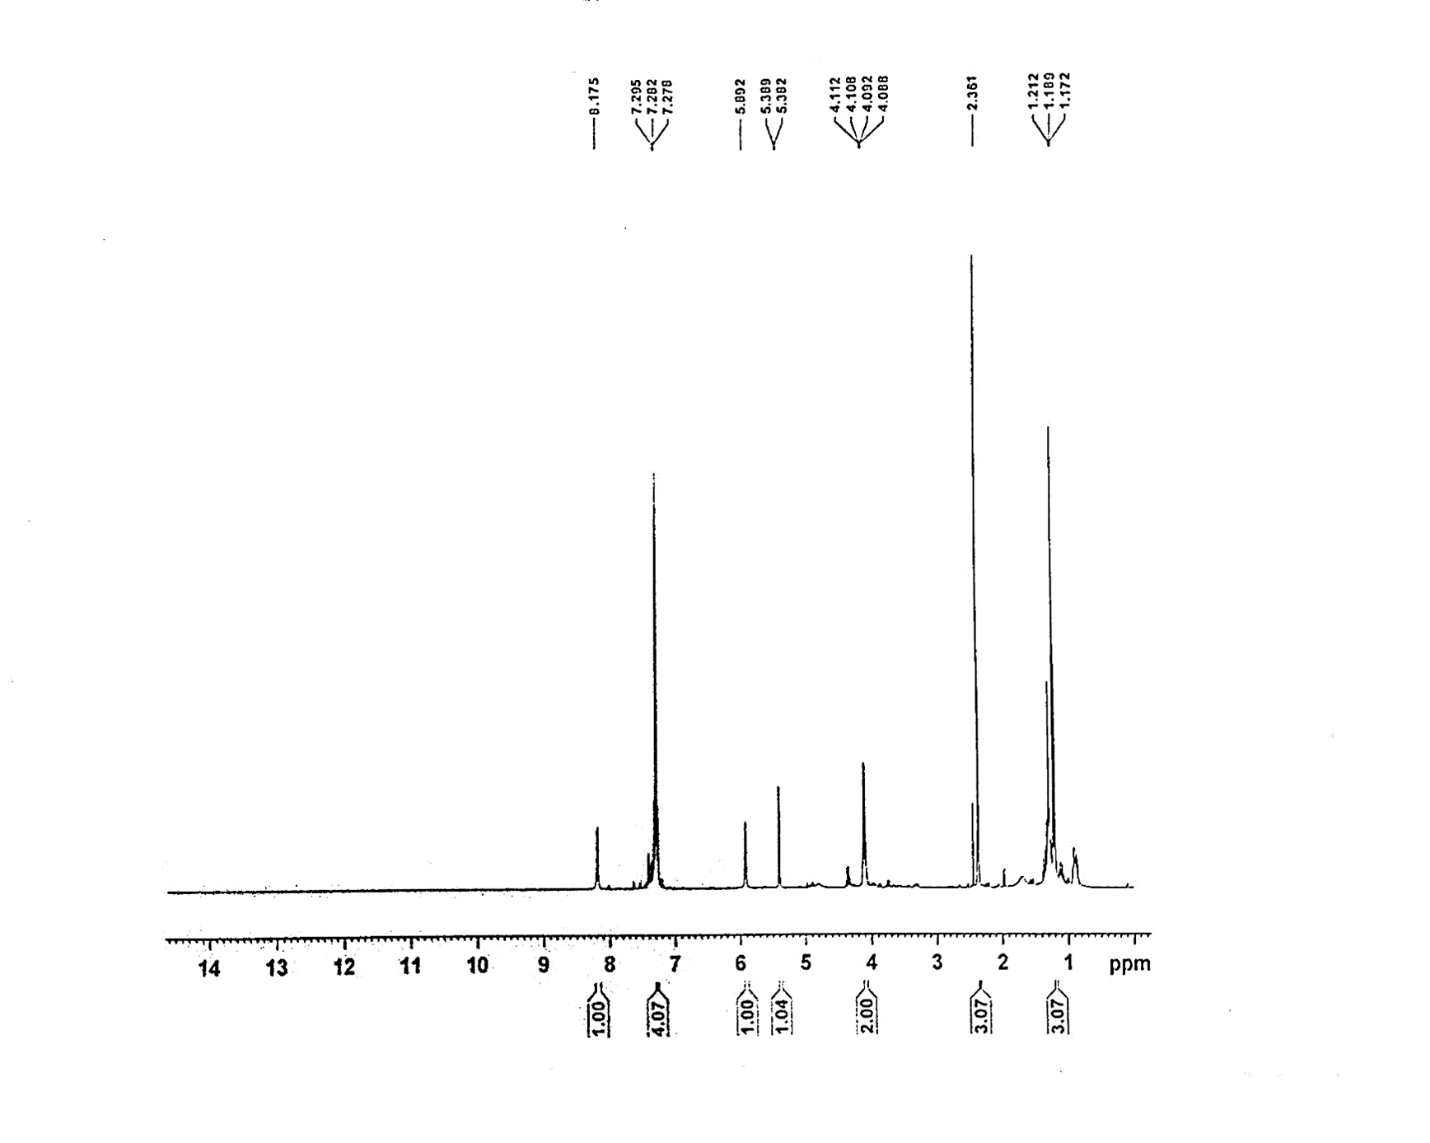


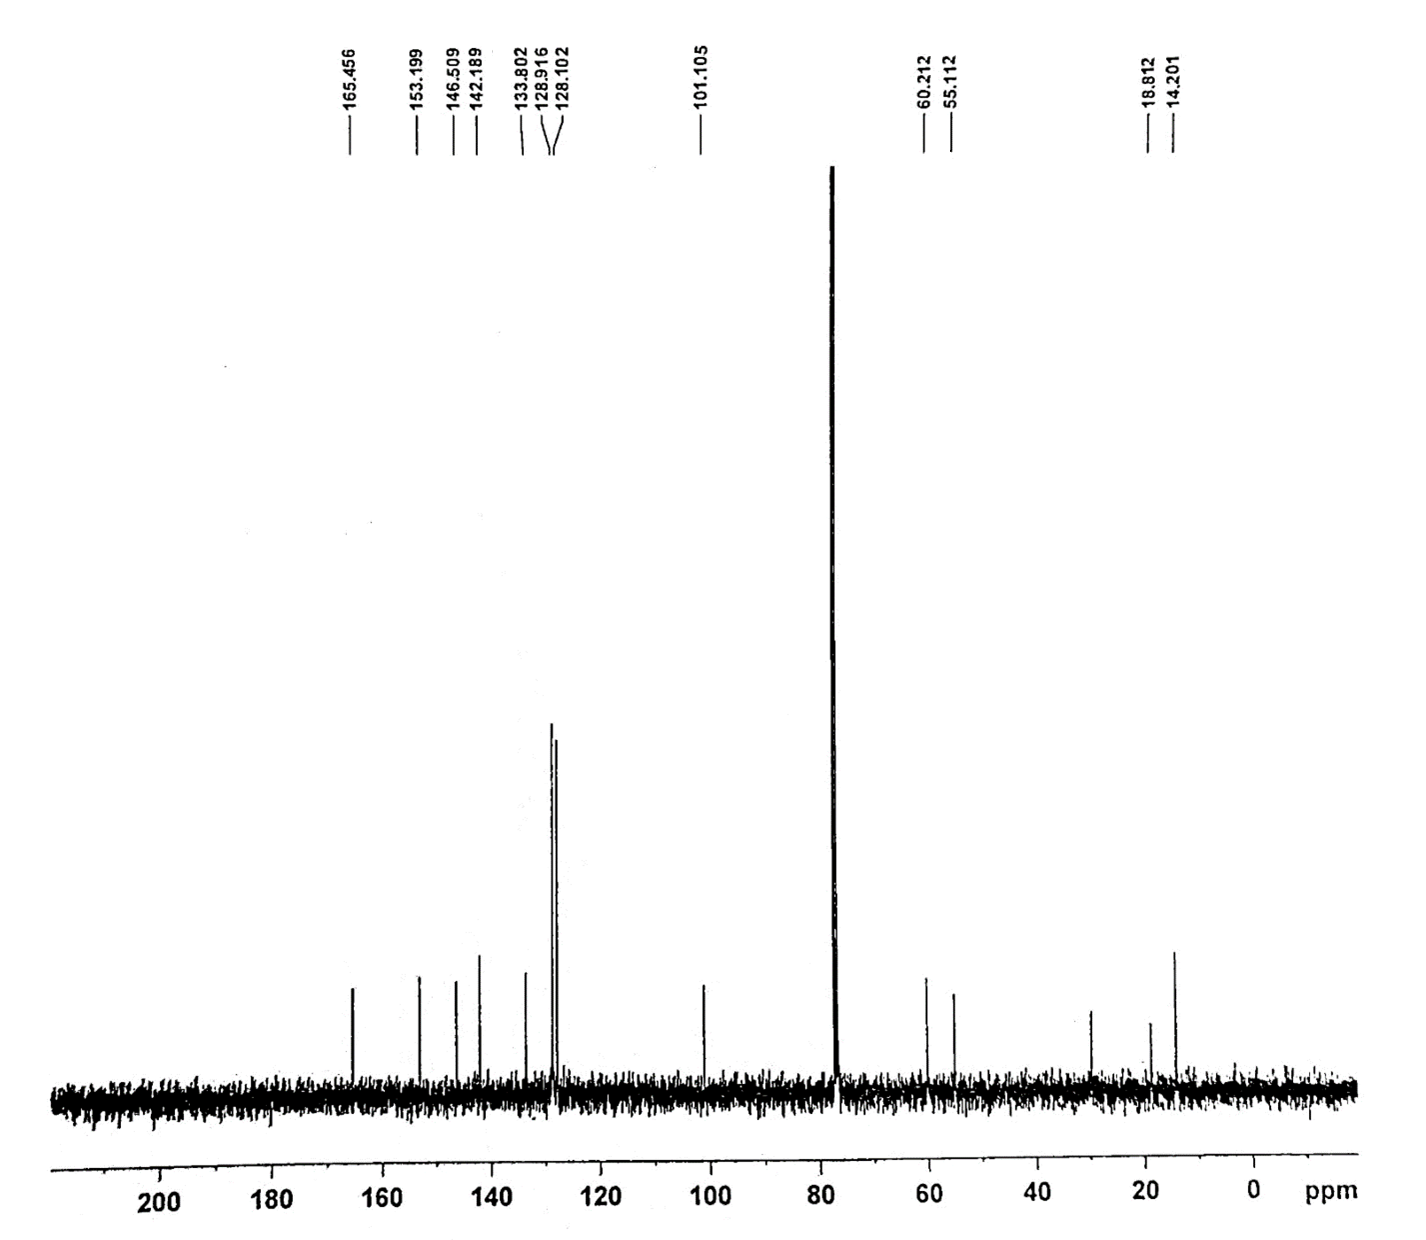


**Fig S6.** 1H NMR (400 MHz, CDCl3), and 13C NMR spectrum of 5-(Ethoxycarbonyl)-4-(4-chlorophenyl)-6-methyl-3,4- dihydropyrimidin-2(1H)-one, (4b).

**5-(Ethoxycarbonyl)-4-(3-bromo phenyl)-6-methyl-3,4- dihydropyrimidin-2(1H)-one, (4c).** **(4c):** mp: 210-212◦C. 1H NMR: (400 MHz, CDCl3): δ (ppm)= 1.20*)* t, 3*J*HH=7.2 Hz, 3H) ,2.38 (s, 3H) ,4.06 -4.17 (m, 2H), 5. 4 (d, 3*J*HH= 2/8, 1H), 7.21 (t, 3*J*HH=7.6, 1H), 7.27-7.28 (m, 1H), 7.8 (m ,1H), 7.29 (s, 1H), 7.42 (3*J*HH=7.6 Hz, 4*J*HH=2 Hz, 1H), 7.47 (4*J*HH=2 Hz, 1H). 13C NMR: (100MHz, CDCl3): *δ* (ppm) = 14.1 ,19.1, 55.4, 60.2, 99.2, 122.7, 125.3, 129.8, 130.4, 131.1, 142.2, 145.7, 152.2, 165.4.


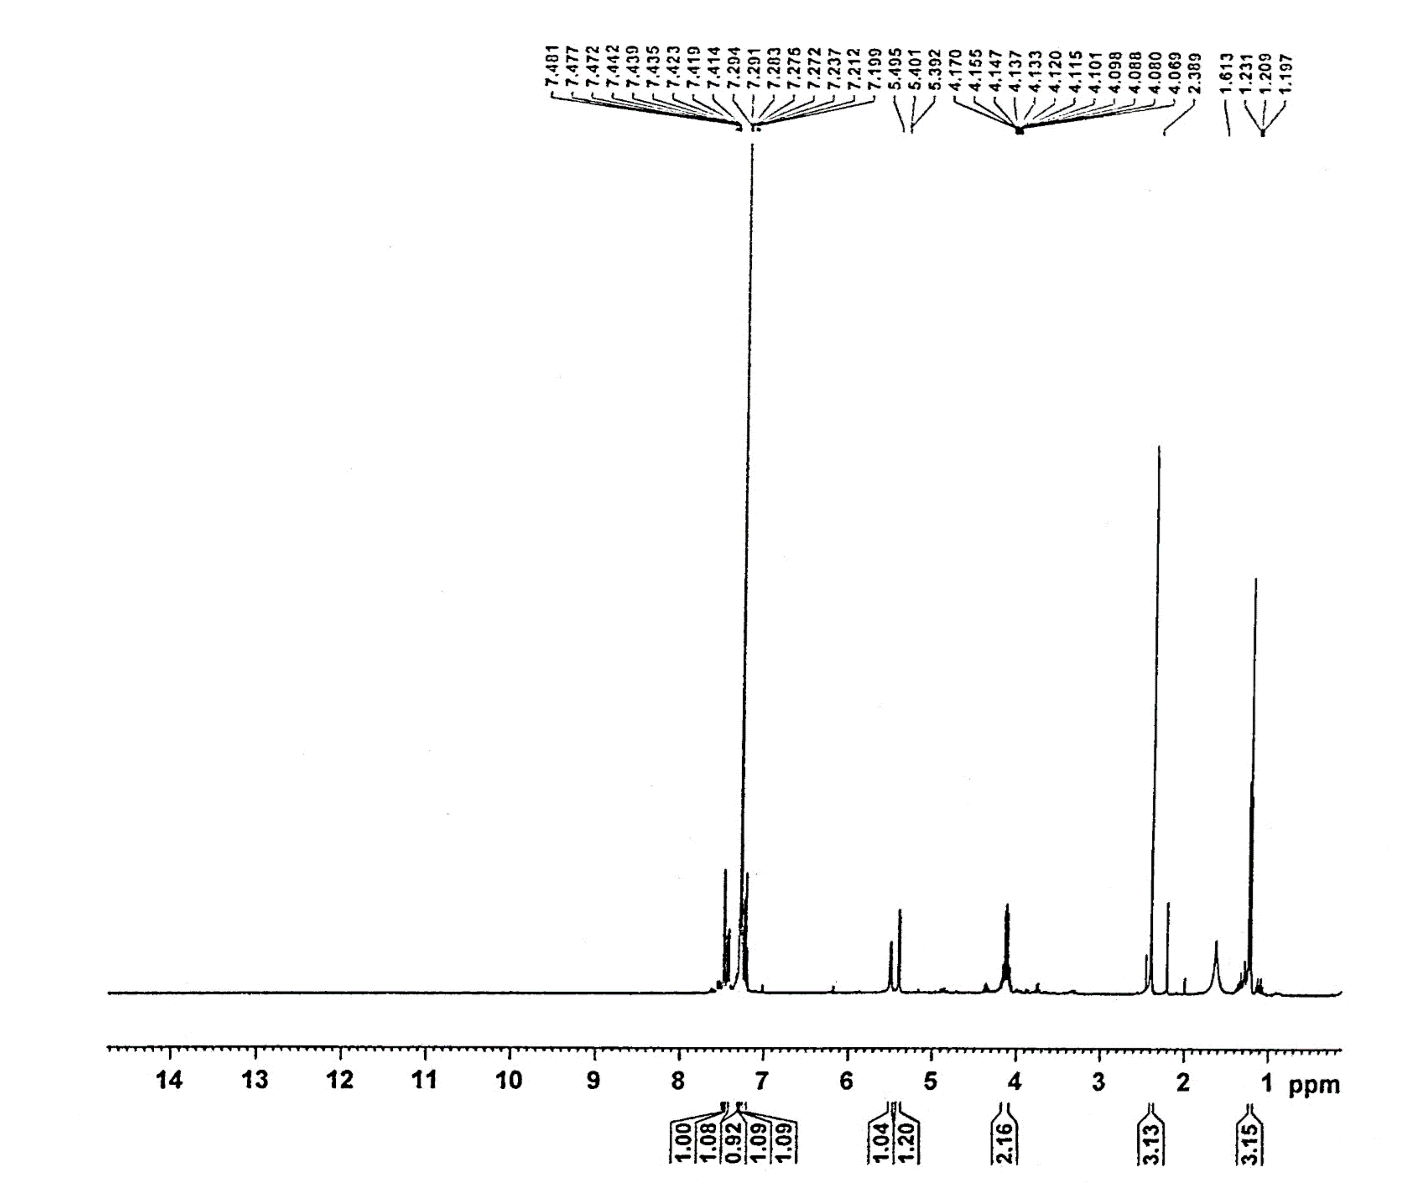


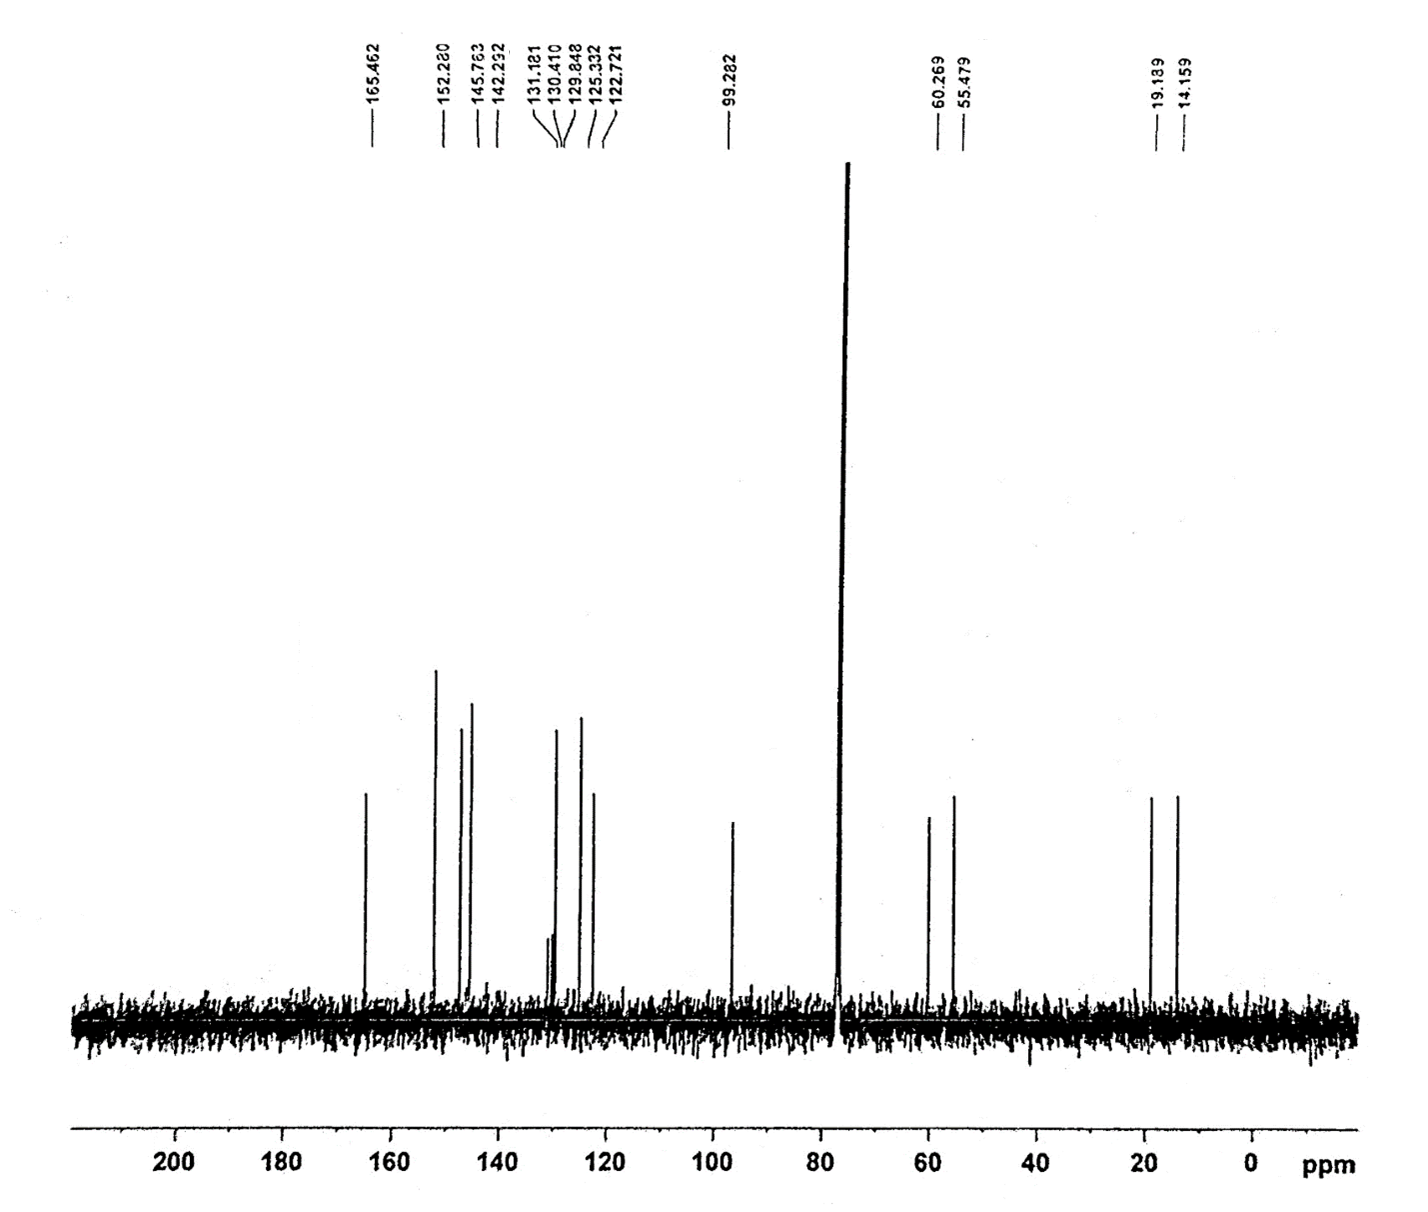


**Fig S7.** 1H NMR (400 MHz, CDCl3) and 13C NMR spectrum of 5-(Ethoxycarbonyl)-4-(3-bromo phenyl)-6-methyl-3,4- dihydropyrimidin-2(1H)-one, (4c).

**5-(Ethoxycarbonyl)-4-(4-nitrophenyl)-6-methyl-3,4-dihydropyrimidin-2(1H)-on**, **(4d)****:** mp: 204-206˚C. 1H NMR: (400 MHz, CDCl3): *δ* (ppm) = 1.21 (t, 3JHH = 6.8 Hz, 3H), 2.39 (s, 3H), 4.14 (q, 3JHH = 6.8 Hz, 2H), 5.54 (d, 3JHH = 2 Hz, 1H), 5.72 (1H, NH, s) ,7.57 (d, 3JHH = 7.2 Hz, 2H, CHAr), 8.2 (d, 3JHH = 7.2 Hz, 2H, CHAr), 9.18 (s, NH, 1H). 13C NMR: (100 MHz, CDCl3): δ (ppm) **=** 14.2, 18.1, 56.1, 60.4, 101.0, 123.9, 127.7, 135.5, 144.7, 147.3, 150.3, 165.1.


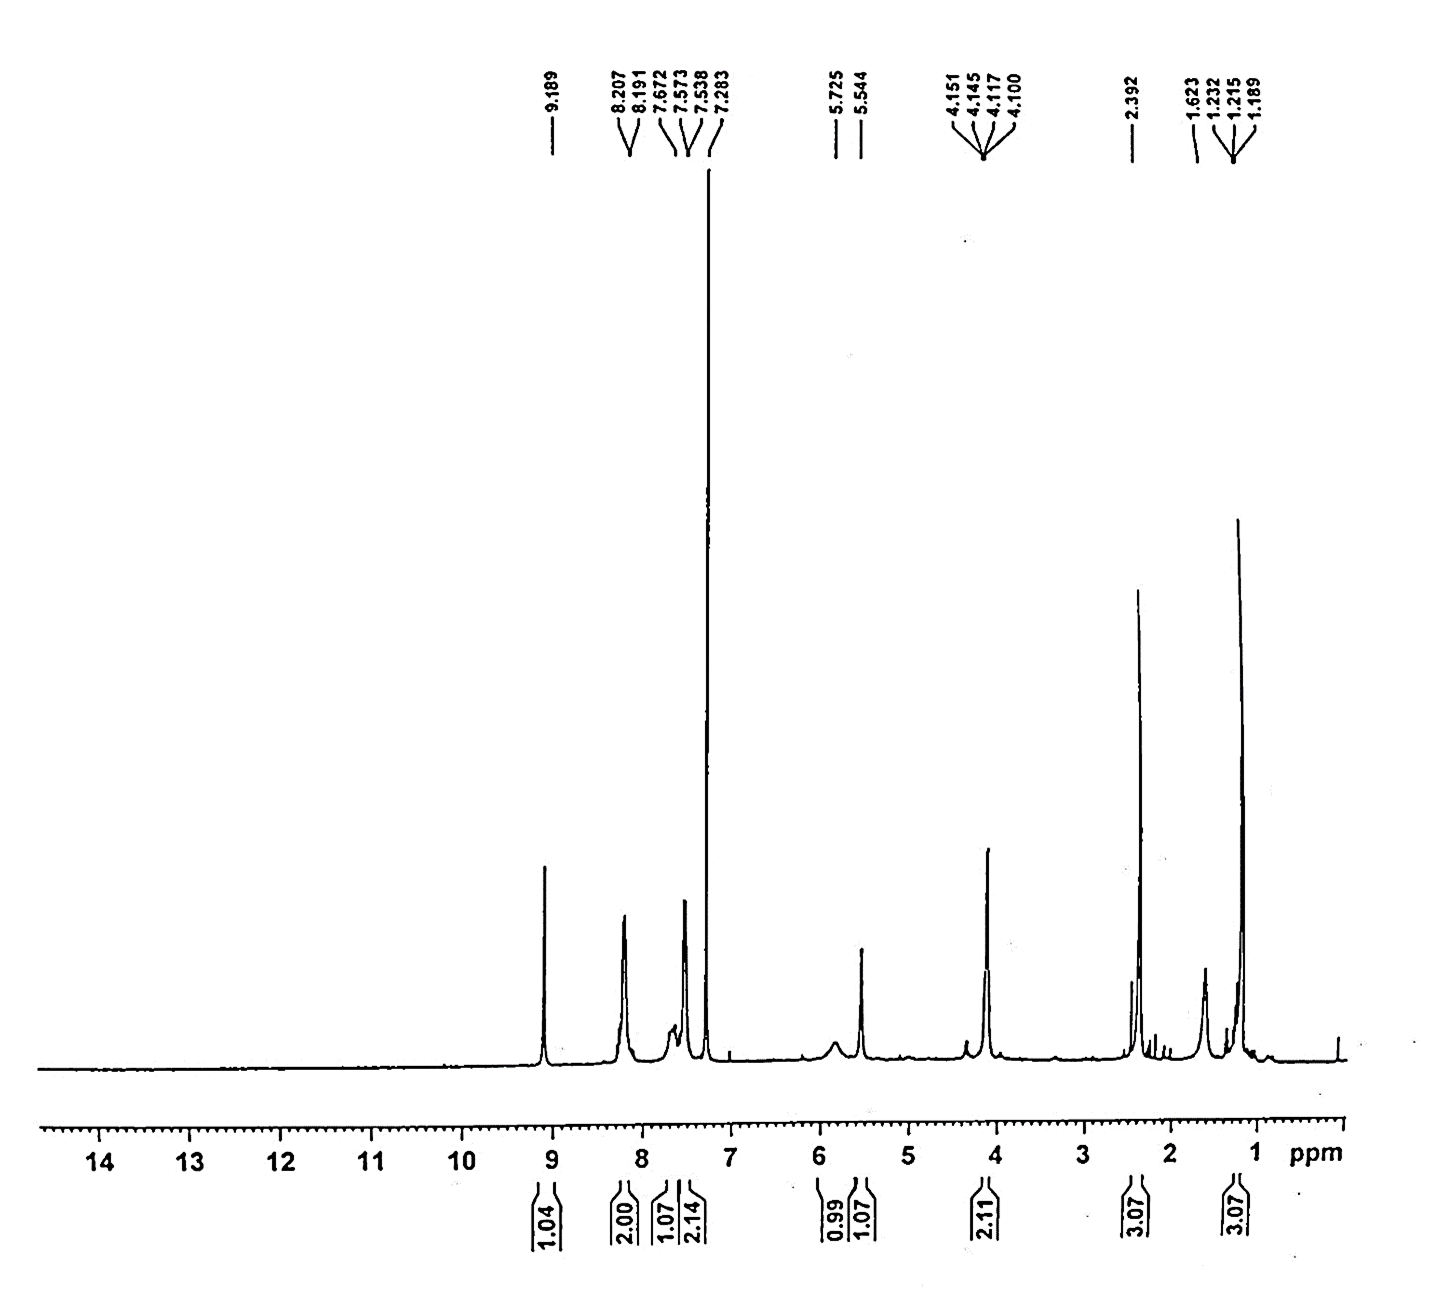


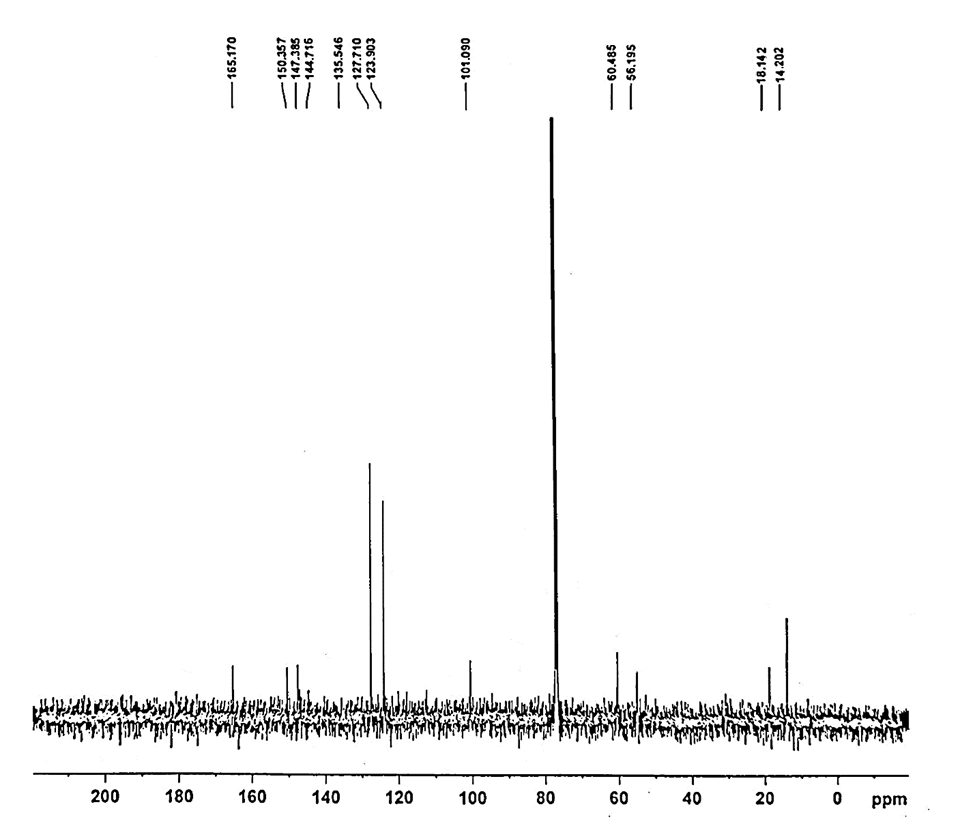


**Fig S8.** 1HNMR (400 MHz, CDCl3) and 13C NMR (100 MHz, CDCl3) spectrum of 5-(Ethoxycarbonyl)-4-(4-nitrophenyl)-6-methyl-4-phenyl-3,4-dihydropyrimidin-2(1H)- one, (4d).
